# Supplementary material
Source: MDPI journal article supplement (https://www.mdpi.com/2073-4352/11/6/688)
Supplement: s1 [file s1]

**Supporting Information for the article**  
**“Synthesis, Structural Studies and Anticancer Properties of The**  
**[CuBr(PPh<sub>3</sub>)<sub>2</sub>(4,6-dimethyl-2-thiopyrimidine-κS)]”**

**Bandar A. Babgi <sup>1\*</sup>, Jalal H. Alsayari <sup>1</sup>, Bambar Davaasuren <sup>2</sup>, Abdul-Hamid M. Emwas <sup>2</sup>,  
Mariusz Jaremko <sup>3</sup>, Magda H. Abdellattif <sup>4</sup>, Mostafa A. Hussien <sup>1,5</sup>**

<sup>1</sup> Department of Chemistry, Faculty of Science, King Abdulaziz University, P.O. Box 80203, Jeddah 21589, Saudi Arabia.

<sup>2</sup> Core Labs, King Abdullah University of Science and Technology (KAUST), Thuwal, 23955-6900, Saudi Arabia.

<sup>3</sup> King Abdullah University of Science and Technology (KAUST), Biological and Environmental Science and Engineering (BESE), Thuwal, 23955-6900, Saudi Arabia.

<sup>4</sup> Chemistry Department, Deanship of Scientific Research, College of Sciences, Taif University, Al-Haweiah, P.O. Box 11099, Taif 21944, Saudi Arabia.

<sup>5</sup> Department of Chemistry, Faculty of Science, Port Said University, Port Said 42521, Egypt.

\* Correspondence: [bbabgi@kau.edu.sa](mailto:bbabgi@kau.edu.sa)

**Keywords:** Copper(I) – thiopyrimidine – Phosphine - Protein binding – Anticancer properties.

Table S1 Fractional Atomic Coordinates ( $\times 10^4$ ) and Equivalent Isotropic Displacement Parameters ( $\text{\AA}^2 \times 10^3$ ) for  $\text{C}_{42}\text{H}_{38}\text{BrCuN}_2\text{P}_2\text{S}$ .  $U_{\text{eq}}$  is defined as 1/3 of the trace of the orthogonalised  $U_{ij}$  tensor.

| Atom | x            | y           | z          | U(eq)      |
|------|--------------|-------------|------------|------------|
| Br1  | 3844.5 (2)   | 6655.2 (2)  | 5203.5 (2) | 20.97 (3)  |
| Cu1  | 2735.6 (2)   | 6989.1 (2)  | 6125.9 (2) | 14.39 (3)  |
| S1   | 791.7 (3)    | 6207.5 (2)  | 6159.9 (2) | 16.85 (5)  |
| P1   | 2148.5 (3)   | 8217.0 (2)  | 5993.6 (2) | 13.88 (5)  |
| P2   | 4259.1 (3)   | 6504.4 (2)  | 6955.0 (2) | 12.36 (5)  |
| N1   | 1824.2 (11)  | 5274.9 (6)  | 5414.8 (5) | 17.22 (17) |
| N2   | 387.9 (12)   | 4737.8 (6)  | 6037.8 (5) | 19.60 (18) |
| C1   | 761.9 (13)   | 8378.8 (6)  | 5318.2 (6) | 17.8 (2)   |
| C2   | -489.6 (14)  | 7977.3 (7)  | 5288.1 (7) | 24.1 (2)   |
| C3   | -1611.2 (16) | 8091.9 (8)  | 4801.1 (8) | 33.0 (3)   |
| C4   | -1484 (2)    | 8591.3 (10) | 4332.9 (8) | 41.0 (4)   |
| C5   | -254 (2)     | 8980.1 (11) | 4355.4 (8) | 41.4 (4)   |
| C6   | 873.6 (17)   | 8881.1 (9)  | 4848.4 (7) | 29.8 (3)   |
| C7   | 3545.7 (13)  | 8872.3 (6)  | 5894.2 (6) | 17.19 (19) |
| C10  | 5780.2 (16)  | 9817.4 (9)  | 5778.3 (8) | 30.7 (3)   |
| C13  | 1435.9 (13)  | 8686.2 (6)  | 6604.6 (5) | 16.73 (19) |
| C14  | 248.4 (14)   | 9143.9 (7)  | 6490.1 (6) | 21.0 (2)   |
| C15  | -175.6 (17)  | 9525.5 (8)  | 6976.8 (7) | 28.6 (3)   |
| C16  | 579.1 (19)   | 9460.1 (9)  | 7575.1 (7) | 32.7 (3)   |
| C17  | 1756.7 (19)  | 9005.9 (10) | 7689.7 (7) | 32.7 (3)   |
| C18  | 2183.9 (16)  | 8614.5 (8)  | 7211.7 (6) | 25.2 (2)   |
| C19  | 6101.6 (12)  | 6749.6 (6)  | 7038.1 (6) | 16.13 (18) |
| C20  | 6407.4 (13)  | 7449.0 (7)  | 6816.7 (7) | 23.0 (2)   |
| C21  | 7790.3 (15)  | 7689.2 (8)  | 6877.4 (8) | 29.1 (3)   |
| C22  | 8873.3 (14)  | 7231.2 (9)  | 7157.5 (8) | 30.1 (3)   |
| C23  | 8579.2 (14)  | 6528.8 (9)  | 7375.4 (8) | 29.6 (3)   |
| C24  | 7200.0 (13)  | 6287.1 (7)  | 7317.0 (7) | 22.4 (2)   |
| C25  | 3856.4 (11)  | 6718.7 (6)  | 7714.0 (5) | 14.24 (17) |
| C26  | 2462.4 (13)  | 6646.9 (8)  | 7789.0 (6) | 22.2 (2)   |
| C27  | 2088.2 (15)  | 6819.5 (9)  | 8351.1 (7) | 27.2 (3)   |
| C28  | 3085.6 (15)  | 7080.3 (8)  | 8842.9 (6) | 24.1 (2)   |
| C29  | 4461.2 (14)  | 7165.1 (8)  | 8770.7 (6) | 22.3 (2)   |
| C30  | 4850.2 (12)  | 6980.3 (7)  | 8211.3 (6) | 17.77 (19) |
| C31  | 4262.5 (11)  | 5480.5 (6)  | 6932.6 (5) | 15.37 (18) |
| C32  | 4770.0 (15)  | 5131.1 (7)  | 6451.9 (6) | 23.7 (2)   |
| C37  | 1026.8 (12)  | 5346.3 (6)  | 5859.9 (5) | 15.55 (18) |
| C38  | 579.6 (14)   | 4075.9 (7)  | 5781.3 (6) | 21.2 (2)   |
| C39  | 1391.4 (14)  | 3992.2 (7)  | 5324.2 (6) | 20.6 (2)   |
| C40  | 2019.3 (13)  | 4616.5 (7)  | 5138.2 (6) | 18.4 (2)   |
| C41  | -141 (2)     | 3411.4 (8)  | 6000.6 (8) | 35.0 (4)   |
| C42  | 2866.7 (16)  | 4619.9 (8)  | 4640.0 (7) | 26.3 (3)   |
| C8   | 4552 (9)     | 8644 (5)    | 5554 (4)   | 22.1 (9)   |
| C9   | 5660 (8)     | 9118 (4)    | 5490 (4)   | 25.8 (8)   |
| C11  | 4825 (8)     | 10040 (4)   | 6116 (4)   | 29.6 (9)   |
| C12  | 3691 (9)     | 9584 (4)    | 6176 (4)   | 26.4 (10)  |
| C33  | 4646 (16)    | 4331 (5)    | 6421 (6)   | 29.7 (11)  |
| C34  | 4157 (9)     | 3922 (4)    | 6868 (4)   | 30.0 (9)   |

Table S1 Fractional Atomic Coordinates ( $\times 10^4$ ) and Equivalent Isotropic Displacement Parameters ( $\text{\AA}^2 \times 10^3$ ) for  $\text{C}_{42}\text{H}_{38}\text{BrCuN}_2\text{P}_2\text{S}$ .  $U_{\text{eq}}$  is defined as 1/3 of the trace of the orthogonalised  $U_{ij}$  tensor.

| Atom | <i>x</i>  | <i>y</i>  | <i>z</i> | <b>U(eq)</b> |
|------|-----------|-----------|----------|--------------|
| C35  | 3783 (8)  | 4274 (3)  | 7355 (4) | 30.8 (8)     |
| C36  | 3822 (10) | 5059 (5)  | 7398 (4) | 28.0 (10)    |
| C8A  | 4694 (10) | 8599 (6)  | 5659 (5) | 22.0 (10)    |
| C9A  | 5804 (9)  | 9073 (4)  | 5618 (4) | 25.6 (9)     |
| C11A | 4607 (8)  | 10102 (4) | 5993 (4) | 27.5 (9)     |
| C12A | 3513 (10) | 9620 (5)  | 6056 (5) | 24.9 (10)    |
| C33A | 4752 (13) | 4374 (4)  | 6354 (5) | 25.7 (8)     |
| C34A | 4079 (7)  | 3932 (4)  | 6714 (3) | 29.7 (8)     |
| C35A | 3469 (7)  | 4254 (3)  | 7178 (3) | 32.3 (8)     |
| C36A | 3578 (8)  | 5025 (4)  | 7289 (3) | 26.8 (9)     |

Table S2 Anisotropic Displacement Parameters ( $\text{\AA}^2 \times 10^3$ ) for  $\text{C}_{42}\text{H}_{38}\text{BrCuN}_2\text{P}_2\text{S}$ . The Anisotropic displacement factor exponent takes the form:  $-2\pi^2[\text{h}^2\text{a}^{*2}\text{U}_{11}+2\text{hka}^*\text{b}^*\text{U}_{12}+\dots]$ .

| Atom | $\text{U}_{11}$ | $\text{U}_{22}$ | $\text{U}_{33}$ | $\text{U}_{23}$ | $\text{U}_{13}$ | $\text{U}_{12}$ |
|------|-----------------|-----------------|-----------------|-----------------|-----------------|-----------------|
| Br1  | 28.87 (6)       | 17.54 (5)       | 18.87 (6)       | 0.91 (4)        | 10.49 (5)       | 0.58 (4)        |
| Cu1  | 15.81 (6)       | 12.71 (5)       | 14.07 (6)       | 0.33 (4)        | 1.39 (4)        | 1.31 (4)        |
| S1   | 15.61 (11)      | 17.13 (11)      | 17.86 (12)      | -4.71 (9)       | 3.33 (9)        | -1.01 (9)       |
| P1   | 14.93 (12)      | 12.40 (11)      | 14.12 (12)      | -0.16 (9)       | 2.29 (9)        | 1.01 (9)        |
| P2   | 10.99 (11)      | 12.75 (11)      | 13.24 (11)      | 0.80 (9)        | 2.09 (9)        | 0.12 (8)        |
| N1   | 17.9 (4)        | 16.2 (4)        | 18.4 (4)        | -2.1 (3)        | 5.8 (3)         | -0.7 (3)        |
| N2   | 24.2 (5)        | 17.9 (4)        | 17.0 (4)        | -1.7 (3)        | 5.0 (4)         | -3.2 (4)        |
| C1   | 20.5 (5)        | 16.5 (4)        | 15.1 (5)        | -2.6 (4)        | 0.4 (4)         | 5.4 (4)         |
| C2   | 22.2 (6)        | 17.6 (5)        | 28.6 (6)        | -3.8 (5)        | -4.4 (5)        | 2.1 (4)         |
| C3   | 25.7 (6)        | 23.6 (6)        | 42.6 (9)        | -8.5 (6)        | -11.8 (6)       | 6.1 (5)         |
| C4   | 41.1 (9)        | 38.1 (8)        | 33.7 (8)        | -4.1 (7)        | -18.1 (7)       | 14.1 (7)        |
| C5   | 49.3 (10)       | 44.2 (10)       | 25.7 (7)        | 11.8 (7)        | -5.2 (7)        | 11.0 (8)        |
| C6   | 32.1 (7)        | 33.9 (7)        | 22.1 (6)        | 9.0 (5)         | 1.9 (5)         | 4.8 (6)         |
| C7   | 19.3 (5)        | 14.4 (4)        | 17.9 (5)        | 1.6 (4)         | 3.7 (4)         | 0.2 (3)         |
| C10  | 28.7 (6)        | 29.2 (6)        | 35.2 (7)        | 4.3 (6)         | 8.4 (6)         | -10.5 (5)       |
| C13  | 19.9 (5)        | 14.7 (4)        | 16.2 (5)        | -2.2 (4)        | 5.2 (4)         | -2.8 (4)        |
| C14  | 22.4 (5)        | 19.7 (5)        | 22.6 (6)        | -3.1 (4)        | 8.3 (4)         | 1.3 (4)         |
| C15  | 32.4 (7)        | 24.1 (6)        | 34.1 (7)        | -7.0 (5)        | 18.4 (6)        | -0.6 (5)        |
| C16  | 45.3 (9)        | 30.6 (7)        | 28.2 (7)        | -11.5 (6)       | 22.0 (7)        | -10.7 (6)       |
| C17  | 43.3 (9)        | 37.7 (8)        | 17.9 (6)        | -7.3 (5)        | 7.8 (6)         | -9.8 (6)        |
| C18  | 29.4 (6)        | 28.5 (6)        | 17.4 (5)        | -2.4 (5)        | 3.5 (5)         | -3.1 (5)        |
| C19  | 12.9 (4)        | 16.8 (4)        | 19.2 (5)        | -0.3 (4)        | 4.5 (4)         | -0.9 (3)        |
| C20  | 18.2 (5)        | 18.0 (5)        | 33.8 (7)        | 2.8 (5)         | 7.9 (5)         | -1.8 (4)        |
| C21  | 22.3 (6)        | 21.0 (6)        | 46.7 (9)        | -1.8 (6)        | 13.7 (6)        | -6.9 (4)        |
| C22  | 16.0 (5)        | 29.1 (6)        | 46.8 (9)        | -7.9 (6)        | 10.4 (6)        | -6.2 (5)        |
| C23  | 12.5 (5)        | 29.9 (7)        | 45.1 (9)        | -1.2 (6)        | 2.6 (5)         | 0.4 (4)         |
| C24  | 13.9 (5)        | 22.0 (5)        | 30.3 (6)        | 2.8 (5)         | 2.0 (4)         | 0.2 (4)         |
| C25  | 14.0 (4)        | 14.8 (4)        | 13.7 (4)        | 0.1 (3)         | 2.0 (3)         | 0.6 (3)         |
| C26  | 14.5 (5)        | 35.9 (7)        | 16.6 (5)        | -5.6 (5)        | 3.6 (4)         | -1.2 (4)        |
| C27  | 18.8 (5)        | 43.6 (8)        | 20.6 (6)        | -6.7 (5)        | 7.0 (5)         | -1.0 (5)        |
| C28  | 27.3 (6)        | 28.0 (6)        | 17.3 (5)        | -4.3 (5)        | 5.4 (5)         | 1.1 (5)         |
| C29  | 25.1 (6)        | 24.1 (5)        | 16.1 (5)        | -4.7 (4)        | 0.4 (4)         | -1.8 (4)        |
| C30  | 16.7 (5)        | 18.1 (5)        | 17.6 (5)        | -1.1 (4)        | 1.0 (4)         | -2.0 (4)        |
| C31  | 13.4 (4)        | 13.9 (4)        | 18.2 (5)        | 1.5 (4)         | 1.6 (4)         | 0.7 (3)         |
| C32  | 31.3 (6)        | 18.9 (5)        | 21.1 (6)        | -0.9 (4)        | 5.6 (5)         | 5.5 (4)         |
| C37  | 15.7 (4)        | 17.0 (4)        | 13.3 (4)        | -1.2 (3)        | 1.2 (3)         | -0.1 (3)        |
| C38  | 25.7 (6)        | 18.4 (5)        | 19.2 (5)        | -2.1 (4)        | 3.4 (4)         | -3.5 (4)        |
| C39  | 23.8 (5)        | 17.6 (5)        | 19.8 (5)        | -4.0 (4)        | 2.7 (4)         | 0.2 (4)         |
| C40  | 17.0 (5)        | 19.6 (5)        | 18.4 (5)        | -3.4 (4)        | 3.0 (4)         | 1.4 (4)         |
| C41  | 51.5 (10)       | 20.8 (6)        | 37.4 (8)        | -4.4 (6)        | 20.2 (7)        | -11.1 (6)       |
| C42  | 26.6 (6)        | 26.4 (6)        | 29.4 (7)        | -6.2 (5)        | 14.3 (5)        | 1.5 (5)         |
| C8   | 26.7 (16)       | 18.8 (14)       | 23 (2)          | 4.0 (14)        | 10.2 (15)       | 1.5 (12)        |
| C9   | 26.8 (16)       | 27.3 (13)       | 26.4 (19)       | 8.1 (14)        | 13.0 (15)       | 0.0 (11)        |
| C11  | 33.9 (18)       | 21.0 (14)       | 33 (2)          | -2.6 (14)       | 5.5 (15)        | -9.6 (12)       |
| C12  | 30 (2)          | 18.2 (13)       | 32 (2)          | -5.5 (15)       | 10.5 (17)       | -5.3 (12)       |
| C33  | 36 (2)          | 19.2 (16)       | 32 (3)          | -6.5 (16)       | 0.9 (17)        | 8.3 (15)        |
| C34  | 39.4 (15)       | 13.4 (11)       | 36 (2)          | 0.9 (16)        | 3.2 (17)        | -0.2 (11)       |

Table S2 Anisotropic Displacement Parameters ( $\text{\AA}^2 \times 10^3$ ) for  $\text{C}_{42}\text{H}_{38}\text{BrCuN}_2\text{P}_2\text{S}$ . The Anisotropic displacement factor exponent takes the form:  $-2\pi^2[h^2a^{*2}U_{11}+2hka^*b^*U_{12}+\dots]$ .

| Atom | $U_{11}$  | $U_{22}$  | $U_{33}$  | $U_{23}$  | $U_{13}$  | $U_{12}$  |
|------|-----------|-----------|-----------|-----------|-----------|-----------|
| C35  | 41.0 (19) | 16.4 (11) | 36 (2)    | 5.1 (14)  | 9.8 (15)  | -3.7 (13) |
| C36  | 37 (2)    | 16.1 (14) | 34 (2)    | 5.1 (16)  | 14.9 (18) | -3.0 (15) |
| C8A  | 26.4 (18) | 18.0 (14) | 24 (2)    | 4.0 (16)  | 10.7 (17) | 1.1 (13)  |
| C9A  | 25.1 (16) | 26.7 (14) | 27 (2)    | 9.0 (15)  | 9.8 (16)  | 0.3 (12)  |
| C11A | 29.9 (18) | 18.5 (13) | 35 (2)    | -1.6 (15) | 9.6 (16)  | -6.1 (12) |
| C12A | 26.9 (19) | 16.6 (13) | 33 (3)    | -2.7 (16) | 11.2 (18) | -4.1 (13) |
| C33A | 33.3 (17) | 18.0 (13) | 25.6 (19) | -0.7 (11) | 5.3 (12)  | 6.2 (11)  |
| C34A | 39.5 (13) | 14.4 (10) | 34 (2)    | -1.9 (14) | 3.1 (15)  | 3.2 (9)   |
| C35A | 40.5 (17) | 18.7 (10) | 39 (2)    | 4.0 (13)  | 10.1 (14) | -5.9 (12) |
| C36A | 33 (2)    | 17.1 (11) | 35 (2)    | 0.1 (13)  | 17.1 (16) | -4.3 (13) |

Table S3 Atomic Occupancy for  $\text{C}_{42}\text{H}_{38}\text{BrCuN}_2\text{P}_2\text{S}$ .

| Atom | Occupancy | Atom | Occupancy | Atom | Occupancy |
|------|-----------|------|-----------|------|-----------|
| H10  | 0.53 (2)  | H10A | 0.47 (2)  | H32  | 0.46 (2)  |
| H32A | 0.54 (2)  | C8   | 0.53 (2)  | H8   | 0.53 (2)  |
| C9   | 0.53 (2)  | H9   | 0.53 (2)  | C11  | 0.53 (2)  |
| H11  | 0.53 (2)  | C12  | 0.53 (2)  | H12  | 0.53 (2)  |
| C33  | 0.46 (2)  | H33  | 0.46 (2)  | C34  | 0.46 (2)  |
| H34  | 0.46 (2)  | C35  | 0.46 (2)  | H35  | 0.46 (2)  |
| C36  | 0.46 (2)  | H36  | 0.46 (2)  | C8A  | 0.47 (2)  |
| H8A  | 0.47 (2)  | C9A  | 0.47 (2)  | H9A  | 0.47 (2)  |
| C11A | 0.47 (2)  | H11A | 0.47 (2)  | C12A | 0.47 (2)  |
| H12A | 0.47 (2)  | C33A | 0.54 (2)  | H33A | 0.54 (2)  |
| C34A | 0.54 (2)  | H34A | 0.54 (2)  | C35A | 0.54 (2)  |
| H35A | 0.54 (2)  | C36A | 0.54 (2)  | H36A | 0.54 (2)  |

Table S4 Bond Lengths for C<sub>42</sub>H<sub>38</sub>BrCuN<sub>2</sub>P<sub>2</sub>S.

| Atom | Atom | Length/Å    | Atom | Atom | Length/Å    |
|------|------|-------------|------|------|-------------|
| Br1  | Cu1  | 2.5412 (2)  | C16  | C17  | 1.384 (3)   |
| Cu1  | S1   | 2.3576 (3)  | C17  | C18  | 1.389 (2)   |
| Cu1  | P1   | 2.2641 (3)  | C19  | C20  | 1.3894 (17) |
| Cu1  | P2   | 2.2849 (3)  | C19  | C24  | 1.3932 (17) |
| S1   | C37  | 1.7017 (12) | C20  | C21  | 1.3910 (18) |
| P1   | C1   | 1.8258 (12) | C21  | C22  | 1.379 (2)   |
| P1   | C7   | 1.8337 (12) | C22  | C23  | 1.388 (2)   |
| P1   | C13  | 1.8265 (12) | C23  | C24  | 1.3889 (18) |
| P2   | C19  | 1.8163 (11) | C25  | C26  | 1.4001 (16) |
| P2   | C25  | 1.8253 (12) | C25  | C30  | 1.3923 (16) |
| P2   | C31  | 1.8237 (11) | C26  | C27  | 1.3873 (18) |
| N1   | C37  | 1.3648 (15) | C27  | C28  | 1.386 (2)   |
| N1   | C40  | 1.3506 (15) | C28  | C29  | 1.383 (2)   |
| N2   | C37  | 1.3433 (15) | C29  | C30  | 1.3930 (18) |
| N2   | C38  | 1.3348 (16) | C31  | C32  | 1.3949 (17) |
| C1   | C2   | 1.4004 (19) | C31  | C36  | 1.400 (8)   |
| C1   | C6   | 1.3859 (19) | C31  | C36A | 1.382 (7)   |
| C2   | C3   | 1.3880 (19) | C32  | C33  | 1.430 (9)   |
| C3   | C4   | 1.383 (3)   | C32  | C33A | 1.364 (8)   |
| C4   | C5   | 1.373 (3)   | C38  | C39  | 1.3986 (18) |
| C5   | C6   | 1.396 (2)   | C38  | C41  | 1.5003 (19) |
| C7   | C8   | 1.399 (8)   | C39  | C40  | 1.3674 (18) |
| C7   | C12  | 1.406 (7)   | C40  | C42  | 1.4902 (18) |
| C7   | C8A  | 1.402 (9)   | C8   | C9   | 1.394 (7)   |
| C7   | C12A | 1.381 (8)   | C11  | C12  | 1.393 (7)   |
| C10  | C9   | 1.392 (7)   | C33  | C34  | 1.379 (8)   |
| C10  | C11  | 1.354 (7)   | C34  | C35  | 1.347 (7)   |
| C10  | C9A  | 1.373 (8)   | C35  | C36  | 1.401 (8)   |
| C10  | C11A | 1.408 (7)   | C8A  | C9A  | 1.385 (8)   |
| C13  | C14  | 1.3948 (17) | C11A | C12A | 1.392 (7)   |
| C13  | C18  | 1.3976 (18) | C33A | C34A | 1.369 (7)   |
| C14  | C15  | 1.3943 (18) | C34A | C35A | 1.396 (6)   |
| C15  | C16  | 1.382 (2)   | C35A | C36A | 1.396 (6)   |

Table S5 Bond Angles for C<sub>42</sub>H<sub>38</sub>BrCuN<sub>2</sub>P<sub>2</sub>S.

| Atom | Atom | Atom | Angle/°      | Atom | Atom | Atom | Angle/°     |
|------|------|------|--------------|------|------|------|-------------|
| S1   | Cu1  | Br1  | 110.564 (9)  | C24  | C19  | P2   | 123.94 (9)  |
| P1   | Cu1  | Br1  | 104.957 (10) | C19  | C20  | C21  | 120.61 (13) |
| P1   | Cu1  | S1   | 113.000 (12) | C22  | C21  | C20  | 120.02 (13) |
| P1   | Cu1  | P2   | 125.153 (12) | C21  | C22  | C23  | 119.81 (12) |
| P2   | Cu1  | Br1  | 103.851 (10) | C22  | C23  | C24  | 120.37 (13) |
| P2   | Cu1  | S1   | 98.723 (12)  | C23  | C24  | C19  | 120.05 (12) |
| C37  | S1   | Cu1  | 110.61 (4)   | C26  | C25  | P2   | 118.00 (9)  |
| C1   | P1   | Cu1  | 112.65 (4)   | C30  | C25  | P2   | 123.36 (9)  |
| C1   | P1   | C7   | 104.47 (6)   | C30  | C25  | C26  | 118.58 (11) |
| C1   | P1   | C13  | 101.62 (6)   | C27  | C26  | C25  | 120.56 (12) |
| C7   | P1   | Cu1  | 117.13 (4)   | C28  | C27  | C26  | 120.38 (13) |
| C13  | P1   | Cu1  | 117.95 (4)   | C29  | C28  | C27  | 119.53 (12) |
| C13  | P1   | C7   | 100.92 (5)   | C28  | C29  | C30  | 120.43 (12) |
| C19  | P2   | Cu1  | 117.65 (4)   | C25  | C30  | C29  | 120.50 (11) |
| C19  | P2   | C25  | 103.71 (5)   | C32  | C31  | P2   | 117.97 (9)  |
| C19  | P2   | C31  | 103.66 (5)   | C32  | C31  | C36  | 121.0 (4)   |
| C25  | P2   | Cu1  | 115.51 (4)   | C36  | C31  | P2   | 120.9 (4)   |
| C31  | P2   | Cu1  | 111.12 (4)   | C36A | C31  | P2   | 124.6 (3)   |
| C31  | P2   | C25  | 103.62 (5)   | C36A | C31  | C32  | 116.5 (3)   |
| C40  | N1   | C37  | 123.45 (11)  | C31  | C32  | C33  | 116.2 (5)   |
| C38  | N2   | C37  | 118.66 (11)  | C33A | C32  | C31  | 124.3 (4)   |
| C2   | C1   | P1   | 117.12 (10)  | N1   | C37  | S1   | 119.89 (9)  |
| C6   | C1   | P1   | 123.84 (11)  | N2   | C37  | S1   | 120.68 (9)  |
| C6   | C1   | C2   | 119.03 (12)  | N2   | C37  | N1   | 119.38 (10) |
| C3   | C2   | C1   | 120.45 (14)  | N2   | C38  | C39  | 122.74 (12) |
| C4   | C3   | C2   | 119.98 (16)  | N2   | C38  | C41  | 116.70 (12) |
| C5   | C4   | C3   | 119.88 (14)  | C39  | C38  | C41  | 120.55 (12) |
| C4   | C5   | C6   | 120.78 (16)  | C40  | C39  | C38  | 118.23 (11) |
| C1   | C6   | C5   | 119.86 (16)  | N1   | C40  | C39  | 117.52 (11) |
| C8   | C7   | P1   | 119.2 (4)    | N1   | C40  | C42  | 118.16 (11) |
| C8   | C7   | C12  | 118.4 (5)    | C39  | C40  | C42  | 124.30 (11) |
| C12  | C7   | P1   | 122.4 (4)    | C9   | C8   | C7   | 120.6 (6)   |
| C8A  | C7   | P1   | 118.8 (4)    | C10  | C9   | C8   | 119.6 (5)   |
| C12A | C7   | P1   | 122.0 (4)    | C10  | C11  | C12  | 121.2 (5)   |
| C12A | C7   | C8A  | 119.2 (6)    | C11  | C12  | C7   | 119.9 (6)   |
| C11  | C10  | C9   | 120.3 (4)    | C34  | C33  | C32  | 122.0 (8)   |
| C9A  | C10  | C11A | 119.2 (5)    | C35  | C34  | C33  | 120.1 (7)   |
| C14  | C13  | P1   | 123.43 (10)  | C34  | C35  | C36  | 120.6 (5)   |
| C14  | C13  | C18  | 119.09 (12)  | C31  | C36  | C35  | 119.6 (6)   |
| C18  | C13  | P1   | 117.35 (10)  | C9A  | C8A  | C7   | 119.8 (7)   |
| C15  | C14  | C13  | 120.10 (13)  | C10  | C9A  | C8A  | 121.3 (6)   |
| C16  | C15  | C14  | 120.55 (14)  | C12A | C11A | C10  | 119.5 (6)   |
| C15  | C16  | C17  | 119.44 (13)  | C7   | C12A | C11A | 120.9 (7)   |
| C16  | C17  | C18  | 120.78 (15)  | C32  | C33A | C34A | 118.1 (7)   |
| C17  | C18  | C13  | 120.04 (14)  | C33A | C34A | C35A | 120.1 (6)   |
| C20  | C19  | P2   | 116.91 (9)   | C34A | C35A | C36A | 120.2 (4)   |
| C20  | C19  | C24  | 119.14 (11)  | C31  | C36A | C35A | 120.5 (5)   |

Table S6 Torsion Angles for C<sub>42</sub>H<sub>38</sub>BrCuN<sub>2</sub>P<sub>2</sub>S.

| A   | B   | C    | D    | Angle/°      | A   | B    | C    | D    | Angle/°      |
|-----|-----|------|------|--------------|-----|------|------|------|--------------|
| Cu1 | S1  | C37  | N1   | -28.88 (10)  | C14 | C15  | C16  | C17  | -0.6 (2)     |
| Cu1 | S1  | C37  | N2   | 153.89 (9)   | C15 | C16  | C17  | C18  | -0.2 (2)     |
| Cu1 | P1  | C1   | C2   | 55.30 (10)   | C16 | C17  | C18  | C13  | 1.1 (2)      |
| Cu1 | P1  | C1   | C6   | -126.02 (11) | C18 | C13  | C14  | C15  | 0.31 (19)    |
| Cu1 | P1  | C7   | C8   | 37.3 (4)     | C19 | P2   | C25  | C26  | 174.90 (10)  |
| Cu1 | P1  | C7   | C12  | -139.2 (5)   | C19 | P2   | C25  | C30  | -2.18 (11)   |
| Cu1 | P1  | C7   | C8A  | 25.2 (5)     | C19 | P2   | C31  | C32  | -61.36 (11)  |
| Cu1 | P1  | C7   | C12A | -153.3 (5)   | C19 | P2   | C31  | C36  | 116.1 (4)    |
| Cu1 | P1  | C13  | C14  | -133.58 (9)  | C19 | P2   | C31  | C36A | 130.6 (4)    |
| Cu1 | P1  | C13  | C18  | 50.57 (11)   | C19 | C20  | C21  | C22  | 0.2 (2)      |
| Cu1 | P2  | C19  | C20  | 30.77 (12)   | C20 | C19  | C24  | C23  | 0.5 (2)      |
| Cu1 | P2  | C19  | C24  | -150.43 (10) | C20 | C21  | C22  | C23  | 0.4 (2)      |
| Cu1 | P2  | C25  | C26  | 44.68 (11)   | C21 | C22  | C23  | C24  | -0.5 (3)     |
| Cu1 | P2  | C25  | C30  | -132.40 (9)  | C22 | C23  | C24  | C19  | 0.0 (2)      |
| Cu1 | P2  | C31  | C32  | 65.93 (10)   | C24 | C19  | C20  | C21  | -0.6 (2)     |
| Cu1 | P2  | C31  | C36  | -116.6 (4)   | C25 | P2   | C19  | C20  | -98.16 (11)  |
| Cu1 | P2  | C31  | C36A | -102.1 (4)   | C25 | P2   | C19  | C24  | 80.64 (12)   |
| P1  | C1  | C2   | C3   | 177.48 (11)  | C25 | P2   | C31  | C32  | -169.41 (10) |
| P1  | C1  | C6   | C5   | -178.61 (13) | C25 | P2   | C31  | C36  | 8.1 (4)      |
| P1  | C7  | C8   | C9   | -177.5 (3)   | C25 | P2   | C31  | C36A | 22.6 (4)     |
| P1  | C7  | C12  | C11  | 175.9 (3)    | C25 | C26  | C27  | C28  | 1.3 (2)      |
| P1  | C7  | C8A  | C9A  | -175.9 (4)   | C26 | C25  | C30  | C29  | 0.08 (18)    |
| P1  | C7  | C12A | C11A | 178.1 (4)    | C26 | C27  | C28  | C29  | -0.3 (2)     |
| P1  | C13 | C14  | C15  | -175.47 (10) | C27 | C28  | C29  | C30  | -0.9 (2)     |
| P1  | C13 | C18  | C17  | 174.94 (11)  | C28 | C29  | C30  | C25  | 1.0 (2)      |
| P2  | C19 | C20  | C21  | 178.24 (12)  | C30 | C25  | C26  | C27  | -1.2 (2)     |
| P2  | C19 | C24  | C23  | -178.28 (12) | C31 | P2   | C19  | C20  | 153.86 (10)  |
| P2  | C25 | C26  | C27  | -178.45 (12) | C31 | P2   | C19  | C24  | -27.34 (12)  |
| P2  | C25 | C30  | C29  | 177.14 (10)  | C31 | P2   | C25  | C26  | -77.08 (11)  |
| P2  | C31 | C32  | C33  | -174.9 (7)   | C31 | P2   | C25  | C30  | 105.84 (10)  |
| P2  | C31 | C32  | C33A | -175.6 (7)   | C31 | C32  | C33  | C34  | -5.1 (16)    |
| P2  | C31 | C36  | C35  | 177.4 (4)    | C31 | C32  | C33A | C34A | 6.3 (13)     |
| P2  | C31 | C36A | C35A | 170.7 (3)    | C32 | C31  | C36  | C35  | -5.2 (8)     |
| N2  | C38 | C39  | C40  | 0.5 (2)      | C32 | C31  | C36A | C35A | 2.5 (6)      |
| C1  | P1  | C7   | C8   | -88.1 (4)    | C32 | C33  | C34  | C35  | -0.2 (17)    |
| C1  | P1  | C7   | C12  | 95.5 (5)     | C32 | C33A | C34A | C35A | -1.8 (13)    |
| C1  | P1  | C7   | C8A  | -100.2 (5)   | C37 | N1   | C40  | C39  | -0.80 (18)   |
| C1  | P1  | C7   | C12A | 81.3 (5)     | C37 | N1   | C40  | C42  | 177.52 (12)  |
| C1  | P1  | C13  | C14  | -9.92 (12)   | C37 | N2   | C38  | C39  | -1.5 (2)     |
| C1  | P1  | C13  | C18  | 174.23 (10)  | C37 | N2   | C38  | C41  | 179.26 (13)  |
| C1  | C2  | C3   | C4   | 1.7 (2)      | C38 | N2   | C37  | S1   | 178.67 (10)  |
| C2  | C1  | C6   | C5   | 0.1 (2)      | C38 | N2   | C37  | N1   | 1.43 (17)    |
| C2  | C3  | C4   | C5   | -0.9 (3)     | C38 | C39  | C40  | N1   | 0.69 (18)    |
| C3  | C4  | C5   | C6   | -0.3 (3)     | C38 | C39  | C40  | C42  | -177.52 (13) |
| C4  | C5  | C6   | C1   | 0.8 (3)      | C40 | N1   | C37  | S1   | -177.54 (10) |
| C6  | C1  | C2   | C3   | -1.3 (2)     | C40 | N1   | C37  | N2   | -0.27 (18)   |



Table S6 Torsion Angles for C<sub>42</sub>H<sub>38</sub>BrCuN<sub>2</sub>P<sub>2</sub>S.

| A   | B    | C    | D    | Angle/°     | A    | B    | C    | D    | Angle/°     |
|-----|------|------|------|-------------|------|------|------|------|-------------|
| C7  | P1   | C1   | C2   | -176.54 (9) | C41  | C38  | C39  | C40  | 179.63 (14) |
| C7  | P1   | C1   | C6   | 2.15 (13)   | C8   | C7   | C12  | C11  | -0.6 (7)    |
| C7  | P1   | C13  | C14  | 97.51 (11)  | C9   | C10  | C11  | C12  | -1.2 (6)    |
| C7  | P1   | C13  | C18  | -78.34 (11) | C11  | C10  | C9   | C8   | -0.3 (6)    |
| C7  | C8   | C9   | C10  | 1.3 (6)     | C12  | C7   | C8   | C9   | -0.9 (7)    |
| C7  | C8A  | C9A  | C10  | -2.7 (8)    | C33  | C34  | C35  | C36  | 3.0 (12)    |
| C10 | C11  | C12  | C7   | 1.6 (7)     | C34  | C35  | C36  | C31  | -0.4 (9)    |
| C10 | C11A | C12A | C7   | -1.9 (7)    | C36  | C31  | C32  | C33  | 7.6 (9)     |
| C13 | P1   | C1   | C2   | -71.89 (10) | C8A  | C7   | C12A | C11A | -0.4 (8)    |
| C13 | P1   | C1   | C6   | 106.80 (12) | C9A  | C10  | C11A | C12A | 1.9 (6)     |
| C13 | P1   | C7   | C8   | 166.8 (4)   | C11A | C10  | C9A  | C8A  | 0.4 (6)     |
| C13 | P1   | C7   | C12  | -9.7 (5)    | C12A | C7   | C8A  | C9A  | 2.7 (8)     |
| C13 | P1   | C7   | C8A  | 154.7 (5)   | C33A | C34A | C35A | C36A | -1.9 (9)    |
| C13 | P1   | C7   | C12A | -23.9 (5)   | C34A | C35A | C36A | C31  | 1.5 (7)     |
| C13 | C14  | C15  | C16  | 0.5 (2)     | C36A | C31  | C32  | C33A | -6.6 (8)    |
| C14 | C13  | C18  | C17  | -1.1 (2)    |      |      |      |      |             |

Table S7 Hydrogen Bonds for C<sub>42</sub>H<sub>38</sub>BrCuN<sub>2</sub>P<sub>2</sub>S.

| D   | H    | A    | d(D-H)/Å | d(H-A)/Å | d(D-A)/Å | D-H-A/°   |
|-----|------|------|----------|----------|----------|-----------|
| N1  | H1   | Br1  | 0.80(2)  | 2.45(2)  | 3.233(1) | 168.9(17) |
| C32 | H32A | Br1  | 0.95     | 3.13     | 3.841(2) | 132.9     |
| C42 | H42C | Br1* | 0.87(2)  | 3.03(2)  | 3.879(2) | 164(2)    |
| C8  | H8   | Br1  | 0.95     | 2.76     | 3.661(9) | 158.4     |

\*Symmetry operator: 1-x, 1-y, 1-z
